# Supplementary material for: Impact of Long-Term Floods on Spatial Dynamics of Myrmica scabrinodis, a Host Ant of a Highly Threatened Scarce Large Blue (Phengaris teleius)
Source: MDPI journal article supplement (doi:10.3390/insects14110891), 2023-11-18
Supplement: s1 [file s1]

Table S1: List and basic characteristics of variables used in analyses of the impacts of major past floods (years 2010, 2013 and 2017) on the survival rare and spatial recolonization of host ant *Myrmica*; Ljubljansko Barje, Slovenia.

| <b>Variable name</b>                    | <b>Variable description</b>                                                         | <b>Used as independent / dependent variable</b>                                                                      | <b>Variable type</b> |
|-----------------------------------------|-------------------------------------------------------------------------------------|----------------------------------------------------------------------------------------------------------------------|----------------------|
| ant presence                            | binary presence of ants in a trap (yes/no)                                          | dependent                                                                                                            | binary               |
| number of ants                          | number of ants in a trap                                                            | this continuous variable was used to calculate binary variable “ant presence”, but was not included in main analyses | continuous           |
| duration of 2010 flood                  | duration of 2010 flood on each of the ant trap site (in days)                       | independent                                                                                                          | continuous           |
| duration of 2013 flood                  | duration of 2013 flood on each of the ant trap sites (in days)                      | independent                                                                                                          | continuous           |
| duration of 2017 flood                  | duration of 2017 flood on each of the ant trap sites (in days)                      | independent                                                                                                          | continuous           |
| distance to refuge in 2010              | distance from the ant trap to the nearest refuge for ants in 2010 flood (in meters) | independent                                                                                                          | continuous           |
| distance to refuge in 2013              | distance from the ant trap to the nearest refuge for ants in 2013 flood (in meters) | independent                                                                                                          | continuous           |
| distance to refuge in 2017              | distance from the ant trap to the nearest refuge for ants in 2017 flood (in meters) | independent                                                                                                          | continuous           |
| meadow ID                               | identifier of the meadows (5 ant traps was set in each of the meadows)              | independent, used as random factor                                                                                   | attributive          |
| habitat use (in years 2010, 2013, 2017) | use of meadows in given year (3 categories: mowed, cultivated, pasture)             | independent                                                                                                          | attribute (3 levels) |
| time elapsed from flood                 | time elapsed from 2010, 2013 or 2017 flood (in years)                               | independent                                                                                                          | continuous           |

Table S2: Comparison of competing GLMM models build to analyse effects of past longer floods (in 2010, 2013 and 2017) and distance from the nearest refuge (unflooded area) on the binary presence (YES/NO) of host ant *Myrmica* on Ljubljansko barje, Slovenia. Models were selected based on AICc and build with procedure best subset. Only the models with  $\Delta AICc \leq 2$  are presented.

| Competing model                                                           | d<br>f | AICc   | $\Delta AICc$ |
|---------------------------------------------------------------------------|--------|--------|---------------|
| days flooded 2017 + distance from refuge 2013                             | 2      | 155,66 |               |
| days flooded 2010 + distance from refuge 2013                             | 2      | 156,34 | 0,68          |
| days flooded 2013 + distance from refuge 2013                             | 2      | 156,53 | 0,87          |
| distance from refuge 2013 + distance from refuge 2017                     | 2      | 156,92 | 1,25          |
| distance from refuge 2010 + distance from refuge 2013                     | 2      | 157,37 | 1,71          |
| distance from refuge 2013                                                 | 1      | 157,66 | 1,99          |
| days flooded 2013 + distance from refuge 2013 + distance from refuge 2017 | 3      | 157,66 | 2,00          |
